# Supplementary material for: Greenhouse Gas Fluxes from the Epiphytic Lichens: Incubation Experiments
Source: MDPI journal article supplement (doi:10.3390/f15010107), 2024-01-05
Supplement: s1 [file s1]

Archive with 1 entries (1 files):
- forests-2686535-supplementary.pdf
